# Supplementary material
Source: PubMed Central journal article supplement (PMC5443946)

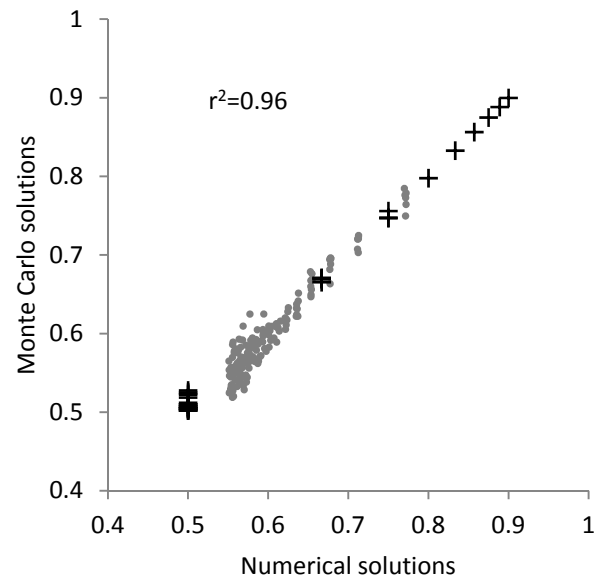

Supplement: rspb20170228supp1.pdf [file rspb20170228supp1.pdf]
